# Supplementary material for: Structural basis for the Rad6 activation by the Bre1 N-terminal domain
Source: eLife. 2023 Mar 13;12:e84157. doi: 10.7554/eLife.84157 (PMC10036116; doi:10.7554/eLife.84157)
Supplement: Figure 1—figure supplement 3—source data 1. [file elife-84157-fig1-figsupp3-data1.zip]

Archive with 5 entries (5 files):
- Fig1_FigSupplement3_labeleled.pdf
- __MACOSX/._Fig1_FigSupplement3_labeleled.pdf
- Panel_A_RawData.jpeg
- __MACOSX/._Panel_A_RawData.jpeg
- Panel_B_RawData.jpeg
