# Supplementary material for: Structural basis for the Rad6 activation by the Bre1 N-terminal domain
Source: eLife. 2023 Mar 13;12:e84157. doi: 10.7554/eLife.84157 (PMC10036116; doi:10.7554/eLife.84157)
Supplement: Figure 1—source data 1. [file elife-84157-fig1-data1.zip]

Archive with 8 entries (8 files):
- Figure1C_labelled.pdf
- __MACOSX/._Figure1C_labelled.pdf
- Figure1C_raw_data_1.jpeg
- __MACOSX/._Figure1C_raw_data_1.jpeg
- Figure1C_raw_data_2.jpg
- __MACOSX/._Figure1C_raw_data_2.jpg
- Figure1C_raw_data_3.jpg
- __MACOSX/._Figure1C_raw_data_3.jpg
