# Supplementary material for: Structural basis for the Rad6 activation by the Bre1 N-terminal domain
Source: eLife. 2023 Mar 13;12:e84157. doi: 10.7554/eLife.84157 (PMC10036116; doi:10.7554/eLife.84157)
Supplement: Figure 2—source data 1. [file elife-84157-fig2-data1.zip]

Archive with 7 entries (7 files):
- Figure2C_raw_data1.jpeg
- Figure2C_raw_data2.jpeg
- __MACOSX/._Figure2C_raw_data2.jpeg
- Figure2CD_labeleled.pdf
- __MACOSX/._Figure2CD_labeleled.pdf
- Figure2D_raw_data.jpeg
- __MACOSX/._Figure2D_raw_data.jpeg
