# Supplementary material for: Structural basis for the Rad6 activation by the Bre1 N-terminal domain
Source: eLife. 2023 Mar 13;12:e84157. doi: 10.7554/eLife.84157 (PMC10036116; doi:10.7554/eLife.84157)
Supplement: Figure 3—figure supplement 1—source data 1. [file elife-84157-fig3-figsupp1-data1.zip]

Archive with 33 entries (33 files):
- Fig3_FigSupplement1_labeled.pdf
- __MACOSX/._Fig3_FigSupplement1_labeled.pdf
- Panel_A_RawData1.jpeg
- Panel_A_RawData2.jpeg
- __MACOSX/._Panel_A_RawData2.jpeg
- Panel_B_RawData.tif
- __MACOSX/._Panel_B_RawData.tif
- Panel_C_RawData.jpg
- __MACOSX/._Panel_C_RawData.jpg
- Panel_D_RawData1.jpg
- __MACOSX/._Panel_D_RawData1.jpg
- Panel_D_RawData2.jpg
- __MACOSX/._Panel_D_RawData2.jpg
- Panel_E_RawData1.jpg
- __MACOSX/._Panel_E_RawData1.jpg
- Panel_E_RawData2.jpg
- __MACOSX/._Panel_E_RawData2.jpg
- Panel_F_Rawdata1.tif
- __MACOSX/._Panel_F_Rawdata1.tif
- Panel_F_Rawdata2.tif
- __MACOSX/._Panel_F_Rawdata2.tif
- Panel_F_Rawdata3.tif
- __MACOSX/._Panel_F_Rawdata3.tif
- Panel_F_Rawdata4_5.tif
- __MACOSX/._Panel_F_Rawdata4_5.tif
- Panel_F_Rawdata6.tif
- __MACOSX/._Panel_F_Rawdata6.tif
- Panel_G_Rawdata1.tif
- __MACOSX/._Panel_G_Rawdata1.tif
- Panel_G_Rawdata2.tif
- __MACOSX/._Panel_G_Rawdata2.tif
- Panel_G_Rawdata3.tif
- __MACOSX/._Panel_G_Rawdata3.tif
