# Supplementary material for: Structural basis for the Rad6 activation by the Bre1 N-terminal domain
Source: eLife. 2023 Mar 13;12:e84157. doi: 10.7554/eLife.84157 (PMC10036116; doi:10.7554/eLife.84157)
Supplement: Figure 3—figure supplement 1—source data 2. [file elife-84157-fig3-figsupp1-data2.xlsx]

## Sheet: Sheet1
	% Rad6~Ub remaining
Time (min)	No RBD	WT	Q22A	K30A	R35E	R41E	R171E	R179A	V180A/F181A
﻿5	78.2231	58.4104	56.2644	68.0691	62.288	61.3728	65.6272	47.1155	56.0264
10	78.5242	53.9596	57.1721	65.7769	59.6333	67.9991	52.2677	44.8768	49.9329
20	62.1582	39.4965	43.3396	56.535	52.1189	66.7442	46.096	38.2488	43.9795
40	56.497	19.8845	29.133	45.0511	42.7461	51.8074	34.0275	36.3793	34.4427
