# Supplementary material for: Structural basis for the Rad6 activation by the Bre1 N-terminal domain
Source: eLife. 2023 Mar 13;12:e84157. doi: 10.7554/eLife.84157 (PMC10036116; doi:10.7554/eLife.84157)
Supplement: Figure 3—source data 1. [file elife-84157-fig3-data1.zip]

Archive with 34 entries (34 files):
- Figure3C_Rawdata_gel1_exp1.tif
- __MACOSX/._Figure3C_Rawdata_gel1_exp1.tif
- Figure3C_Rawdata_gel1_exp2.tif
- __MACOSX/._Figure3C_Rawdata_gel1_exp2.tif
- Figure3C_Rawdata_gel2_exp1.tif
- __MACOSX/._Figure3C_Rawdata_gel2_exp1.tif
- Figure3C_Rawdata_gel2_exp2.tif
- __MACOSX/._Figure3C_Rawdata_gel2_exp2.tif
- Figure3C_Rawdata_gel3_exp1.tif
- __MACOSX/._Figure3C_Rawdata_gel3_exp1.tif
- Figure3C_Rawdata_gel3_exp2.tif
- __MACOSX/._Figure3C_Rawdata_gel3_exp2.tif
- Figure3D_RawData_Gel1_exp1.jpg
- __MACOSX/._Figure3D_RawData_Gel1_exp1.jpg
- Figure3D_RawData_Gel1_exp2.jpg
- __MACOSX/._Figure3D_RawData_Gel1_exp2.jpg
- Figure3D_RawData_Gel1_exp3.jpg
- __MACOSX/._Figure3D_RawData_Gel1_exp3.jpg
- Figure3D_RawData_Gel2_exp1.jpg
- __MACOSX/._Figure3D_RawData_Gel2_exp1.jpg
- Figure3D_RawData_Gel2_exp2.jpg
- __MACOSX/._Figure3D_RawData_Gel2_exp2.jpg
- Figure3D_RawData_Gel2_exp3.jpg
- __MACOSX/._Figure3D_RawData_Gel2_exp3.jpg
- Figure3D_RawData_Gel3_exp1.jpg
- __MACOSX/._Figure3D_RawData_Gel3_exp1.jpg
- Figure3D_RawData_Gel3_exp2.jpg
- __MACOSX/._Figure3D_RawData_Gel3_exp2.jpg
- Figure3D_RawData_Gel3_exp3.jpg
- __MACOSX/._Figure3D_RawData_Gel3_exp3.jpg
- Figure3BCD_labeleled.pdf
- __MACOSX/._Figure3BCD_labeleled.pdf
- Figure3B_RawData.tiff
- __MACOSX/._Figure3B_RawData.tiff
