# Supplementary material for: Structural basis for the Rad6 activation by the Bre1 N-terminal domain
Source: eLife. 2023 Mar 13;12:e84157. doi: 10.7554/eLife.84157 (PMC10036116; doi:10.7554/eLife.84157)
Supplement: Figure 3—source data 2. [file elife-84157-fig3-data2.xlsx]

## Sheet: Figure 3E and 3F
	Intensity				intensity/intensity of ctrl*100				Ave	STD
	Exp 1	Exp 2	Exp 3		Exp 1	Exp 2	Exp 3
ctrl	9096.1	8464.98	8947.52		100	100	100		100	0
No RBD 5min	815.406	709.213	304.335		8.96434	8.3782	3.40133		6.91463	3.05668
No RBD 10min	531.749	843.991	557.991		5.8459	9.97038	6.23627		7.35085	2.27696
No RBD 20min	1078.7	1727.36	1976.53		11.8589	20.4059	22.0902		18.1183	5.48586
No RBD 40min	2984.77	3233.01	4070.43		32.8137	38.1928	45.4922		38.8329	6.36345
WT 5min	1253.11	554.163	708.577		13.7764	6.54653	7.91926		9.41405	3.83972
WT 10min	1454.53	1443.06	1088.28		15.9907	17.0474	12.163		15.067	2.56989
WT 20min	3182.6	2745.84	2881.01		34.9886	32.4376	32.199		33.2084	1.54628
WT 40min	5422.72	4714.38	4879.38		59.6158	55.6927	54.5333		56.6139	2.66357
Q22A 5min	1025.94	497.335	827.406		11.2789	5.8752	9.24732		8.80048	2.72942
Q22A 10min	1986.18	951.527	1898.53		21.8355	11.2407	21.2185		18.0983	5.94679
Q22A 20min	4032.01	2839.3	3751.3		44.3268	33.5418	41.9256		39.9314	5.66233
Q22A 40min	5010.18	4734.79	5282.15		55.0805	55.9338	59.0349		56.6831	2.0809
	Exp 1	Exp 2	Exp 3		Exp 1	Exp 2	Exp 3
ctrl	6312.98	14811.1	9116.81		100	100	100		100	0
K30A 5min	399.627	1007.65	312.213		6.33024	6.80335	3.42459		5.51939	1.82951
K30A 10min	407.042	1102.96	700.577		6.4477	7.44688	7.68445		7.19301	0.6563
K30A 20min	969.062	2769.98	1599.7		15.3503	18.7021	17.5467		17.1997	1.70264
K30A 40min	2524.18	5696.52	3309.94		39.984	38.4613	36.3059		38.2504	1.8481
R35E 5min	331.971	533.355	286.042		5.25854	3.60106	3.13752		3.99904	1.11511
R35E 10min	499.456	851.719	569.87		7.91157	5.75056	6.25076		6.63763	1.13126
R35E 20min	847.648	3160.38	1601.99		13.4271	21.338	17.5718		17.4456	3.95696
R35E 40min	2210.53	4891.38	3087.53		35.0156	33.0252	33.8663		33.969	0.999167
R41E 5min	563.749	509.113	170.799		8.92999	3.43739	1.87345		4.74694	3.70606
R41E 10min	590.991	887.134	623.82		9.36152	5.98968	6.84252		7.39791	1.75319
R41E 20min	1053.06	2923.74	1752.53		16.6809	19.7403	19.223		18.5481	1.63756
R41E 40min	2679.72	5474.2	4156.18		42.4477	36.9603	45.5881		41.6654	4.36682
	Exp 1	Exp 2	Exp 3		Exp 1	Exp 2	Exp 3
ctrl	9536.47	6517.28	11520.4		100	100	100		100	0
R171E 5min	114.364	38.536	762.619		1.19923	0.59129	6.61975		2.80342	3.31898
R171E 10min	801.82	585.234	1073.18		8.40793	8.97973	9.31554		8.90107	0.458886
R171E 20min	1625.18	1188.94	3166.84		17.0418	18.2429	27.4891		20.9246	5.71664
R171E 40min	3791.08	3554.2	5142.48		39.7535	54.5351	44.6381		46.3089	7.53111
R179A 5min	370.213	221.021	904.477		3.88208	3.39131	7.85111		5.0415	2.44554
R179A 10min	802.234	372.335	1698.55		8.41228	5.71305	14.7439		9.62306	4.63556
R179A 20min	1968.55	961.406	2928.55		20.6423	14.7517	25.4206		20.2715	5.34413
R179A 40min	4665.03	2543.72	4543.89		48.9178	39.0304	39.4422		42.4635	5.59341
V180A/F181A 5min	507.456	140.778	624.406		5.32122	2.16007	5.42002		4.30044	1.85427
V180A/F181A 10min	522.577	271.385	1341.84		5.47978	4.16409	11.6476		7.09714	3.99531
V180A/F181A 15min	1659.48	832.406	2831.86		17.4014	12.7723	24.5813		18.2517	5.95026
V180A/F181A 20min	4210.38	2946.08	4316.35		44.1503	45.2042	37.4672		42.2739	4.19596

## Sheet: Figure 3G
	Slope	Error of slope
﻿No RBD	0.913218	0.0771243
RBD+WT	1.52074	0.0698391
RBD+Q22A	1.44153	0.0641257
RBD+K30A	0.87684	0.0600112
RBD+R35E	0.840597	0.0224993
RBD+R41E	0.940569	0.0523013
RBD+R171E	0.90694	0.0394636
RBD+R179A	1.04324	0.0171299
RBD+V180A/F181A	1.0116	0.0545949
