# Supplementary material for: Structural basis for the Rad6 activation by the Bre1 N-terminal domain
Source: eLife. 2023 Mar 13;12:e84157. doi: 10.7554/eLife.84157 (PMC10036116; doi:10.7554/eLife.84157)
Supplement: Figure 4—source data 1. [file elife-84157-fig4-data1.xlsx]

## Sheet: Figure 4E
	With RBD	No RBD
exp 1	88	44
exp 2	64	35
exp 3	93.75	19.35
exp 4	100	59.5
Average	86.4375	39.4625
STD	15.7406	16.798
TTEST	0.00649355
