# Supplementary material for: Structural basis for the Rad6 activation by the Bre1 N-terminal domain
Source: eLife. 2023 Mar 13;12:e84157. doi: 10.7554/eLife.84157 (PMC10036116; doi:10.7554/eLife.84157)
Supplement: Figure 5—source data 1. [file elife-84157-fig5-data1.zip]

Archive with 12 entries (12 files):
- Figure5A_RawData1.jpg
- __MACOSX/._Figure5A_RawData1.jpg
- Figure5AE_labeled.pdf
- __MACOSX/._Figure5AE_labeled.pdf
- Figure5E_RawData1.jpg
- __MACOSX/._Figure5E_RawData1.jpg
- Figure5E_RawData2.jpg
- __MACOSX/._Figure5E_RawData2.jpg
- Figure5E_RawData3.jpg
- __MACOSX/._Figure5E_RawData3.jpg
- Figure5E_RawData4.jpg
- __MACOSX/._Figure5E_RawData4.jpg
