# Supplementary material for: Structural basis for the Rad6 activation by the Bre1 N-terminal domain
Source: eLife. 2023 Mar 13;12:e84157. doi: 10.7554/eLife.84157 (PMC10036116; doi:10.7554/eLife.84157)
Supplement: Figure 5—source data 2. [file elife-84157-fig5-data2.xlsx]

## Sheet: Sheet1
	vector	Bre1-WT	bre1-Q23A	bre1-Q30A	bre1-K31D	bre1-R36E	bre1-R42E	bre1-Q30AK31D	bre1-R36ER42E
% survival 1	55.8456	78.8773	74.9687	54.375	56.5982	58.8859	65.4886	54.9492	58.0897
% survival 2	51.7949	80.8108	77.7778	52.988	59.4203	56.0606	65.8915	53.3613	51.5712
% survival 3	57.3009	82.6877	79.0698	56.797	57.0039	60.385	71.9101	55.6086	55.121
Ave	54.9805	80.7919	77.2721	54.72	57.6741	58.4439	67.7634	54.6397	54.9273
stdev	2.85314	1.90527	2.09677	1.92778	1.52575	2.19583	3.59682	1.15515	3.26357
ttest		0.000200164	0.0977751	7.6034e-05	8.08419e-05	0.000183943	0.00517661	3.45653e-05	0.000289915
