# Supplementary material for: Structural basis for the Rad6 activation by the Bre1 N-terminal domain
Source: eLife journal article supplement (doi:10.7554/elife.84157), 2023-03-13
Supplement: supp [file elife-84157-supp-v1.zip]

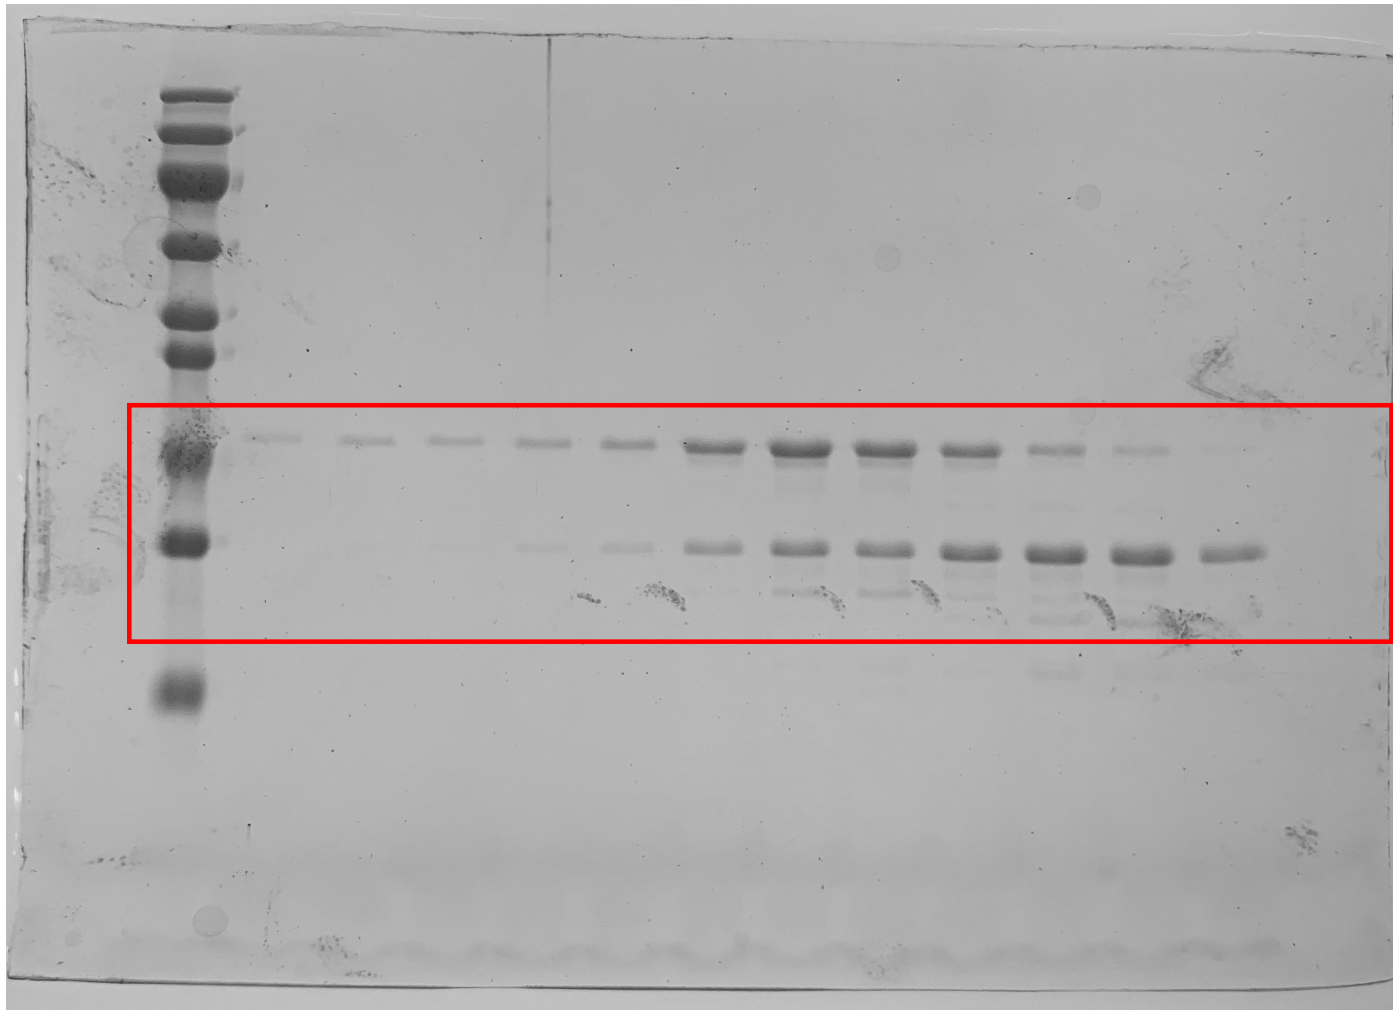

The marked area is presented in Figure 1C, 1:1 RBD:Rad6 ratio

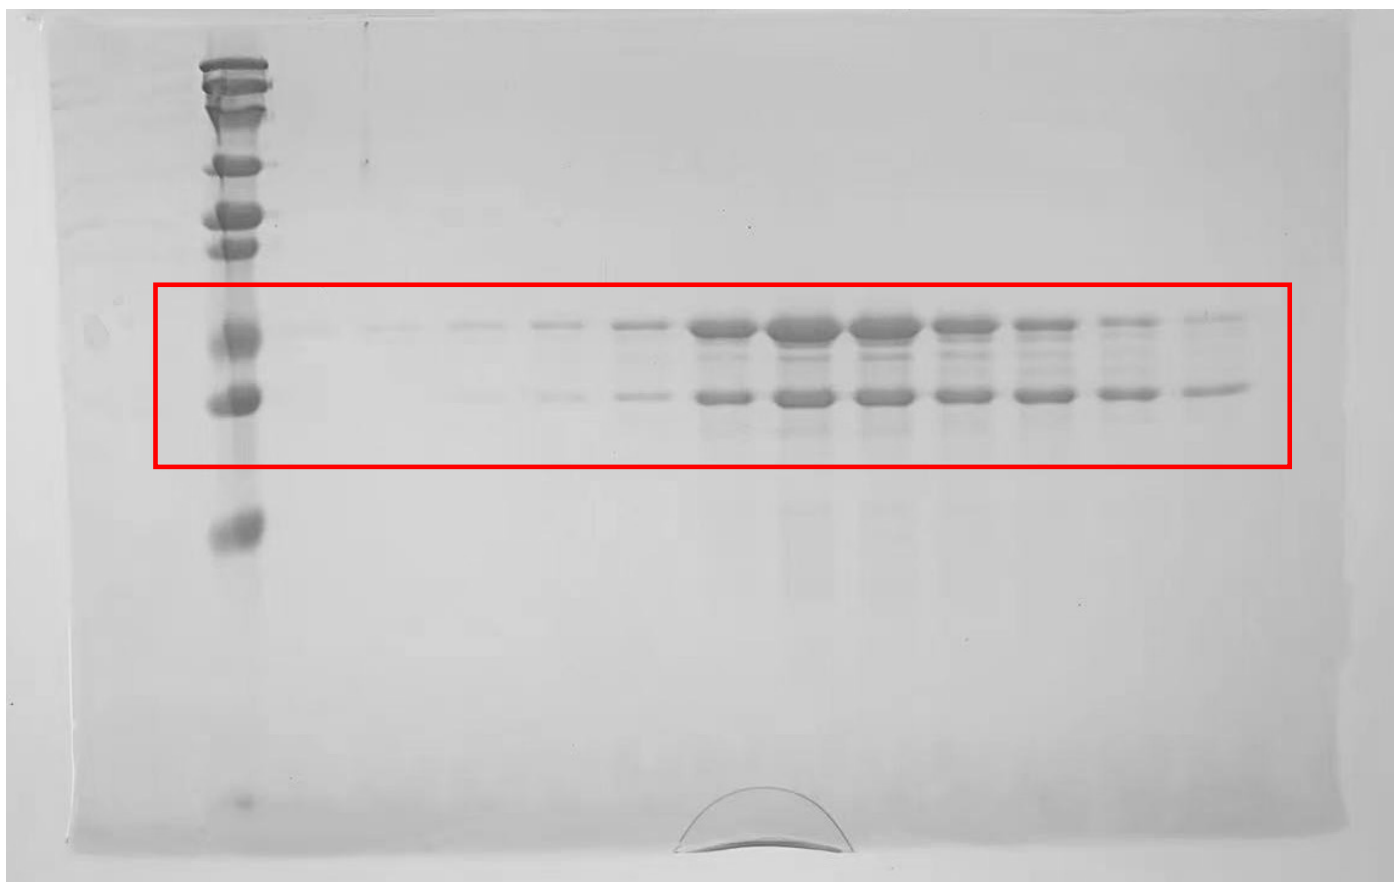

The marked area is presented in Figure 1C, 2:1 RBD:Rad6 ratio

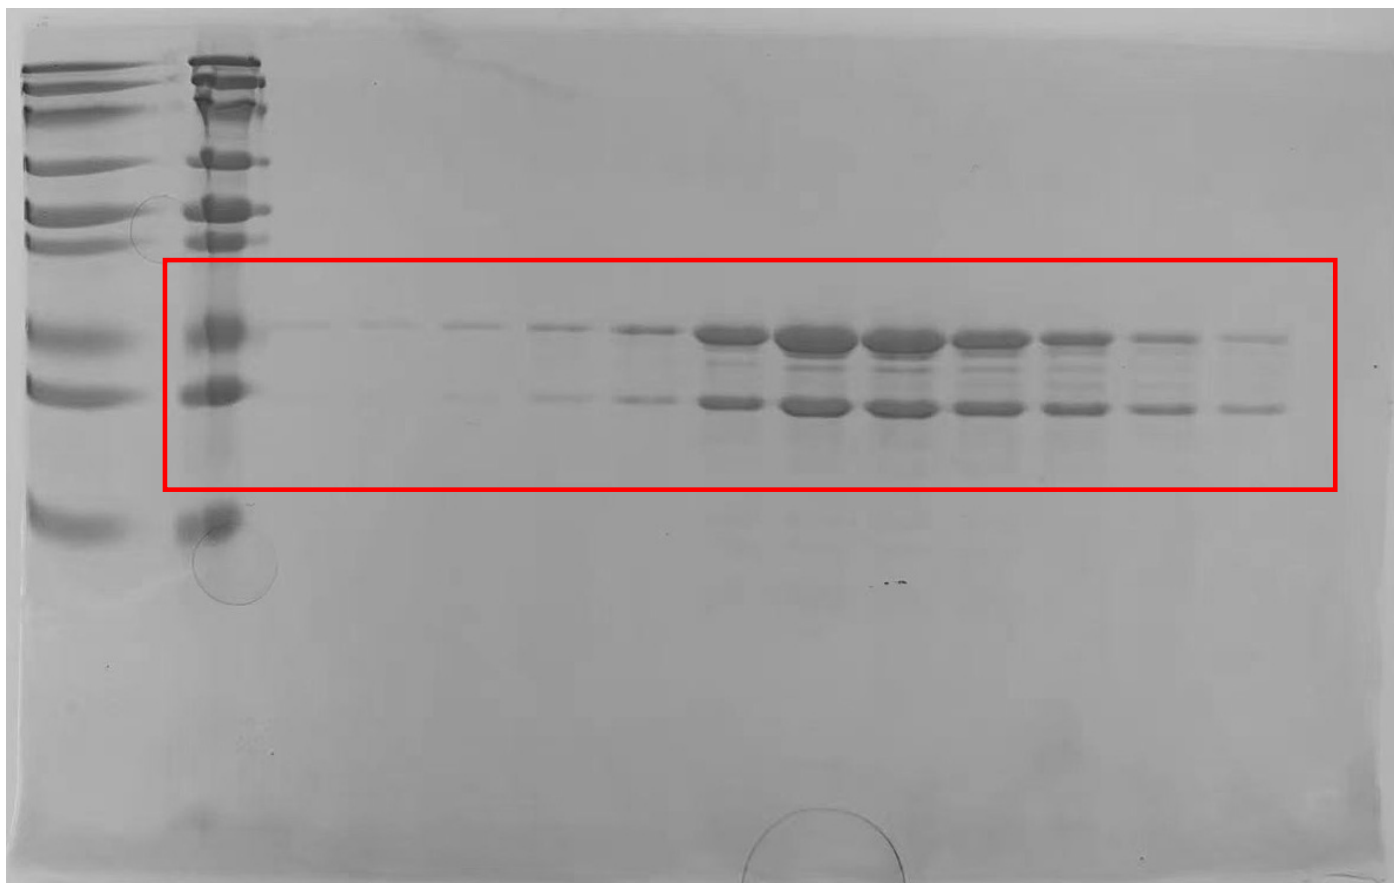

The marked area is presented in Figure 1C, 3:1 RBD:Rad6 ratio
