# Supplementary material for: Structural basis for the Rad6 activation by the Bre1 N-terminal domain
Source: eLife journal article supplement (doi:10.7554/elife.84157), 2023-03-13
Supplement: supp [file elife-84157-supp-v1.zip]

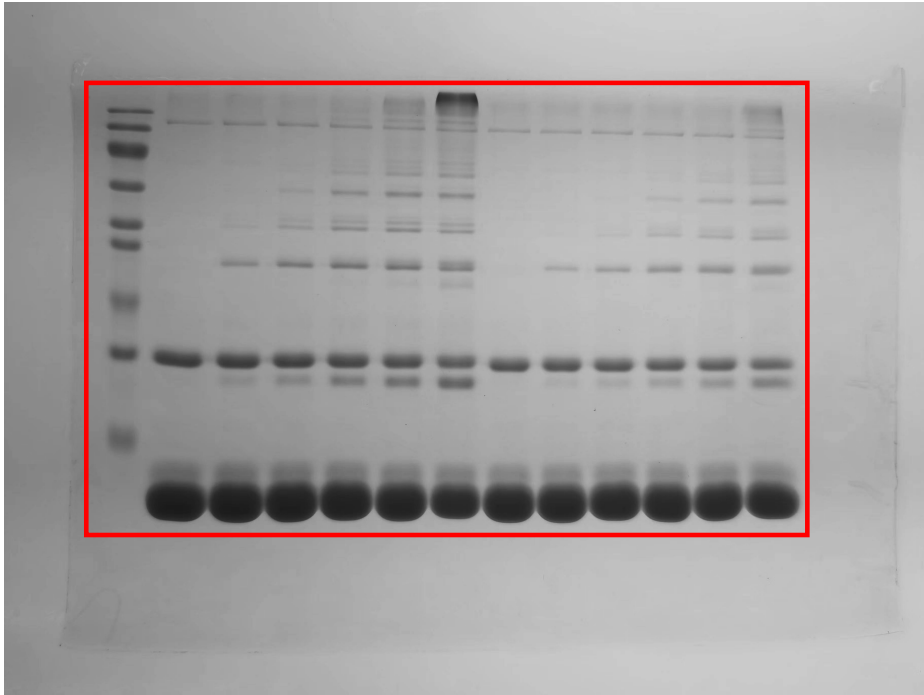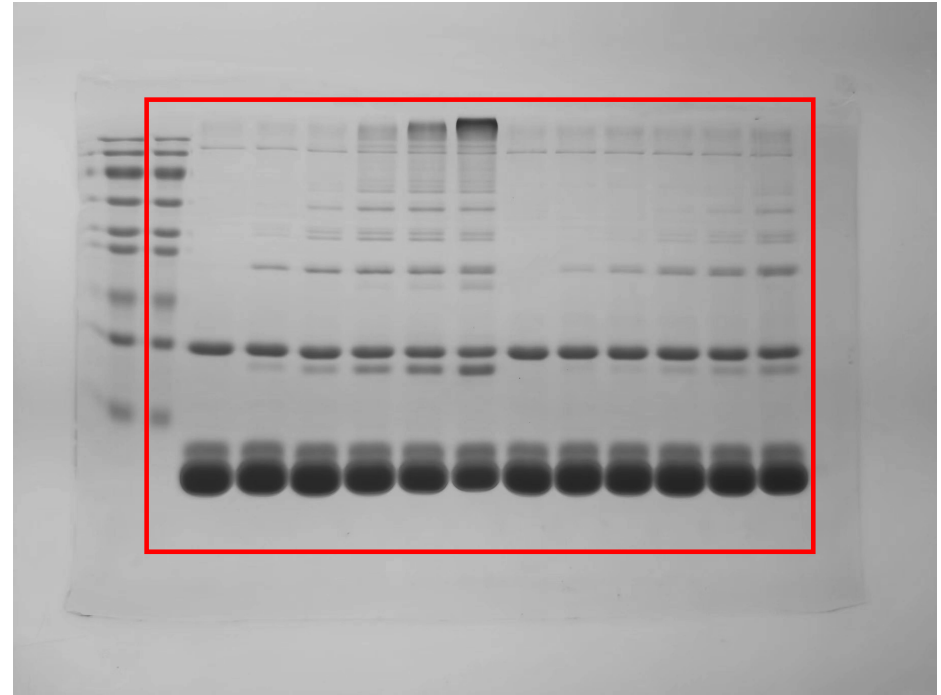

Marked areas are presented in panel A

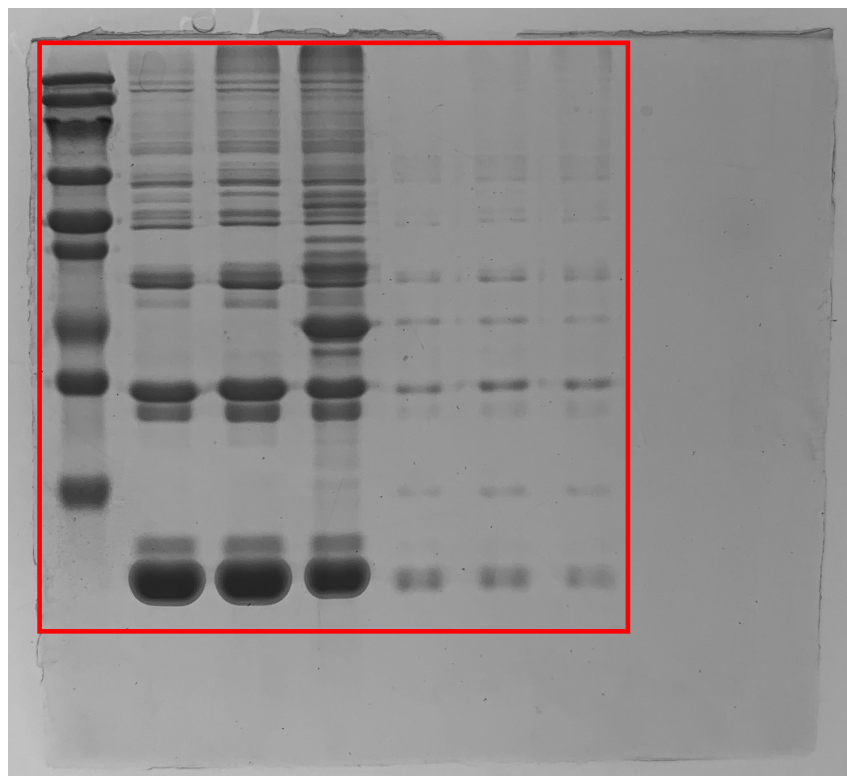

The marked area is presented in panel B

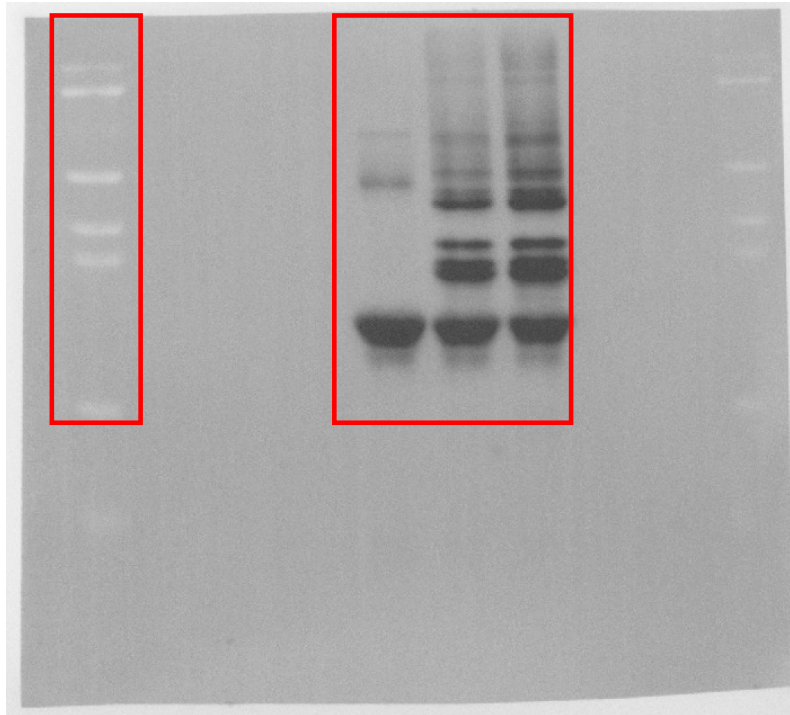

Marked areas are presented in panel C

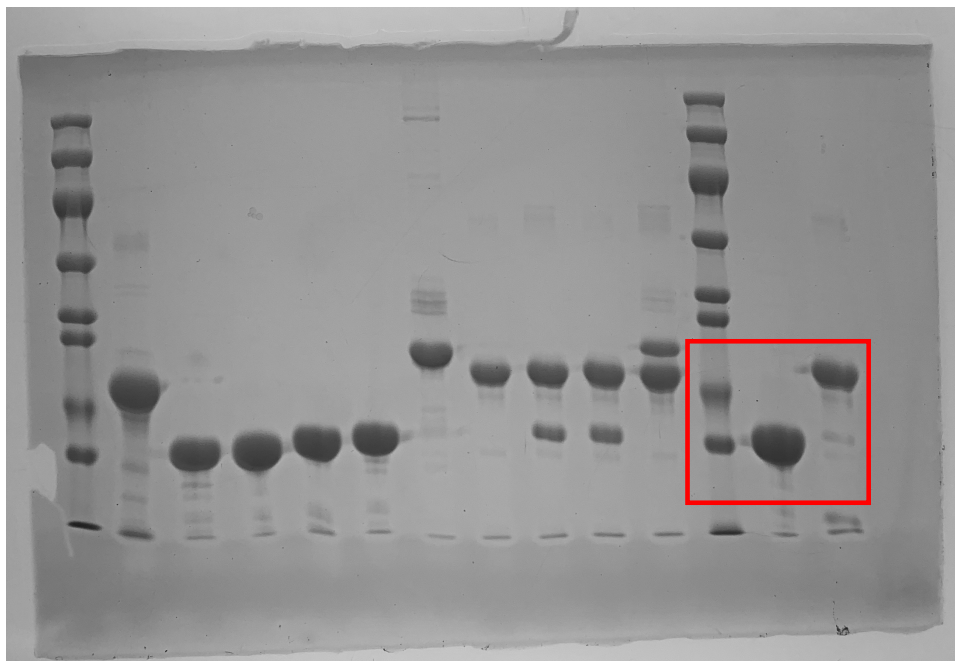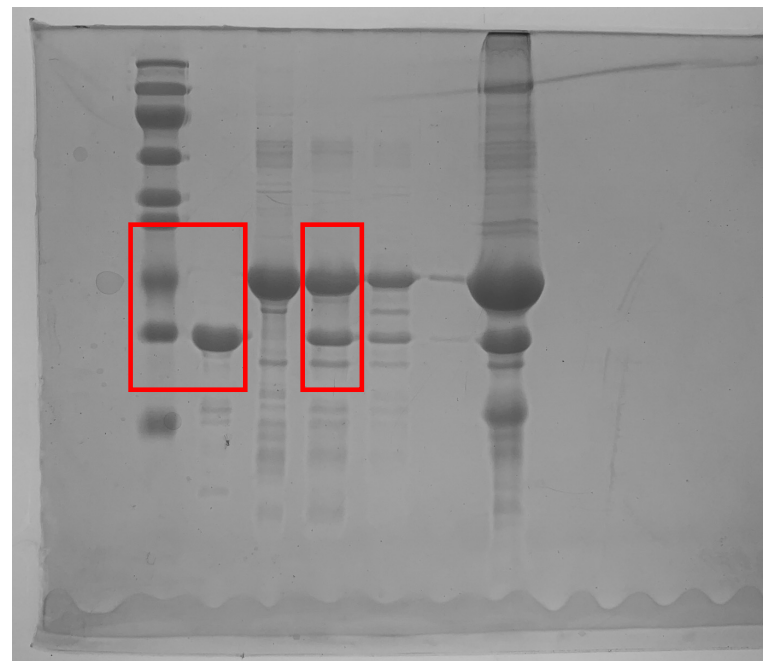

Marked areas are presented in panel D

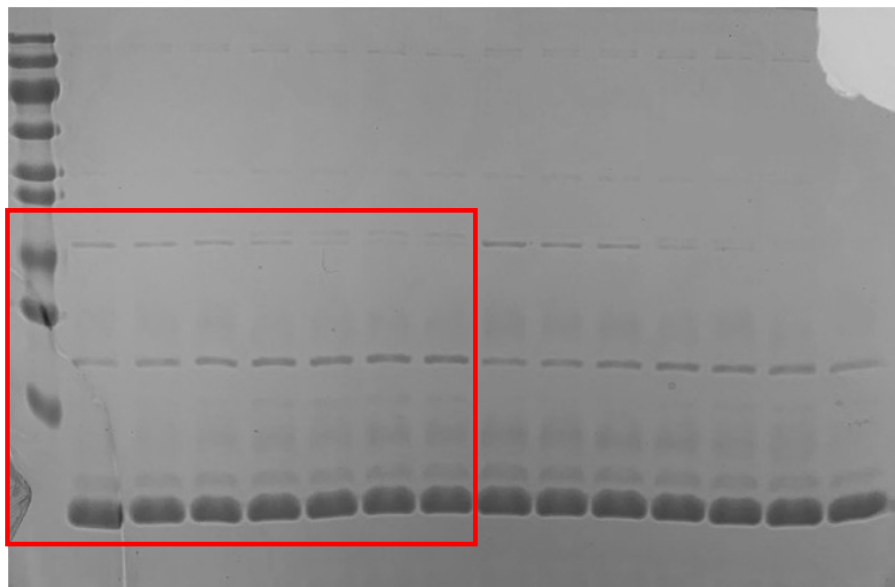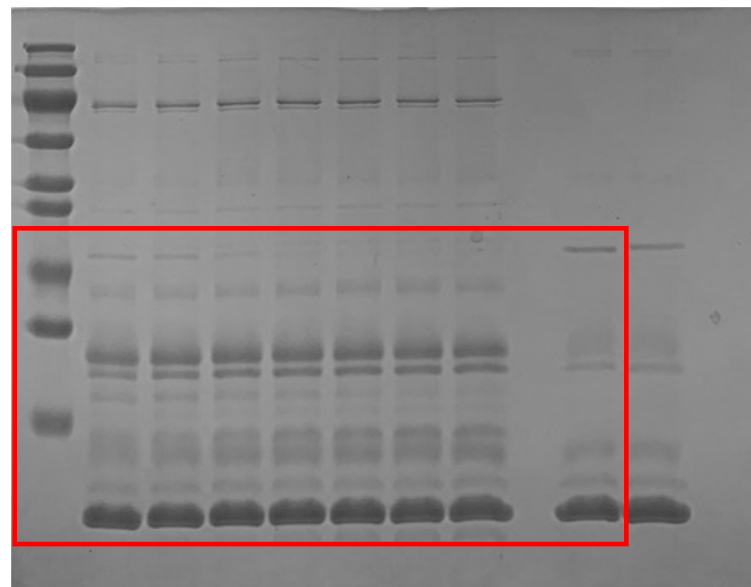

Marked areas are presented in panel E

SDS PAGE

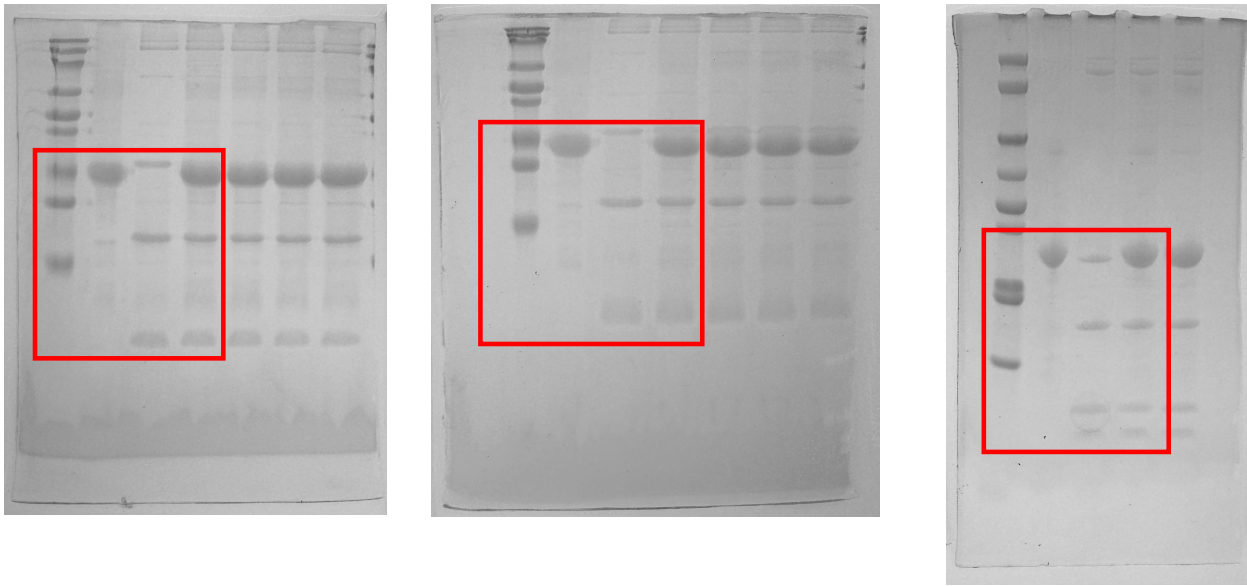

Marked areas are presented in panel F

Western blot

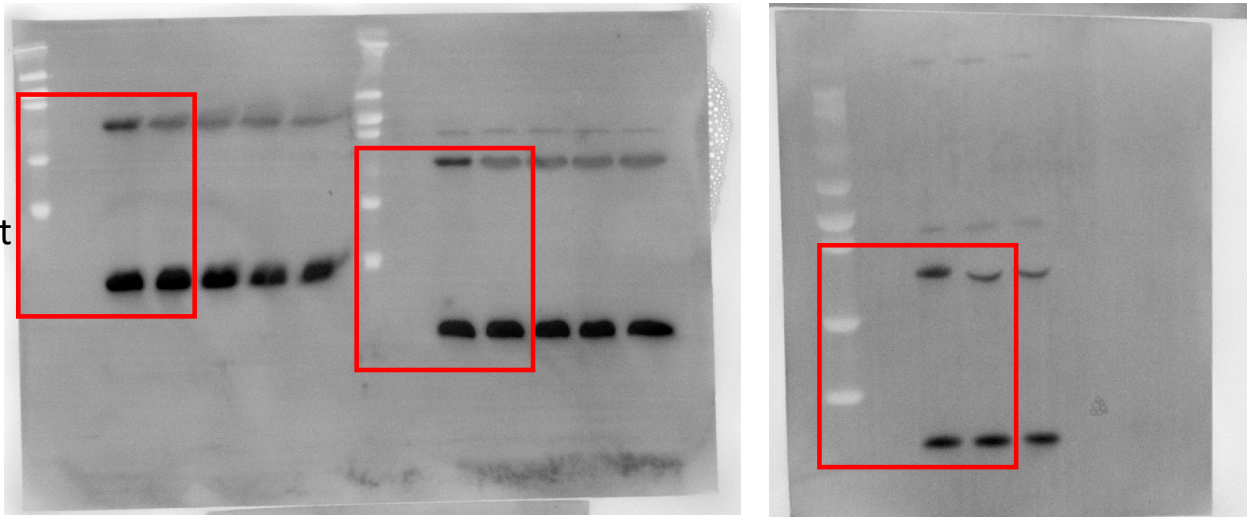



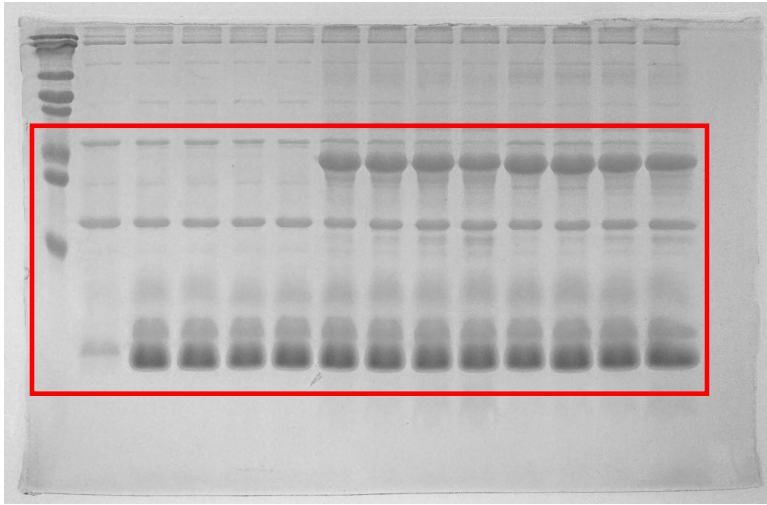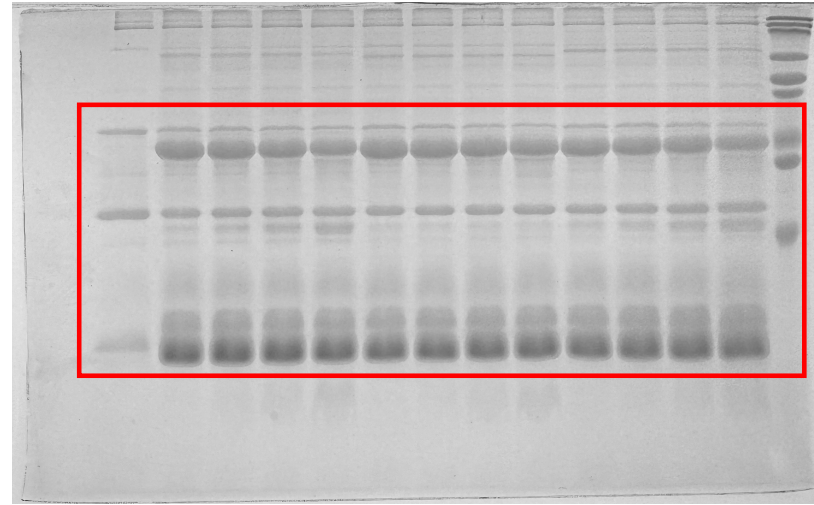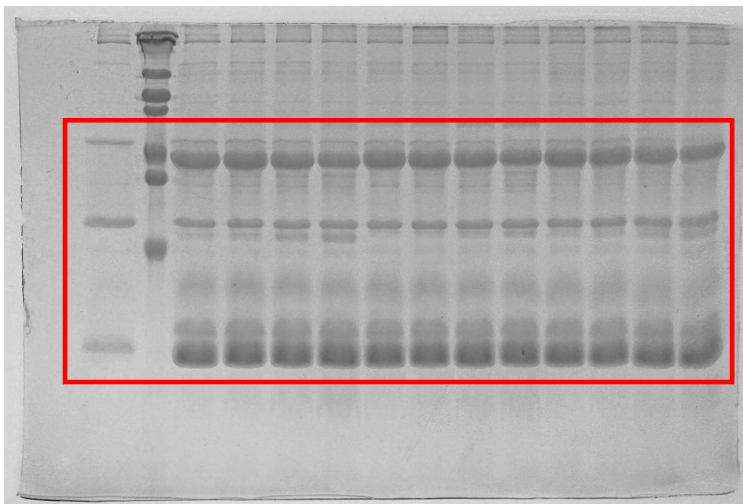

Marked areas are presented in  
panel G
