# Supplementary material for: Structural basis for the Rad6 activation by the Bre1 N-terminal domain
Source: eLife journal article supplement (doi:10.7554/elife.84157), 2023-03-13
Supplement: supp [file elife-84157-supp-v1.zip]

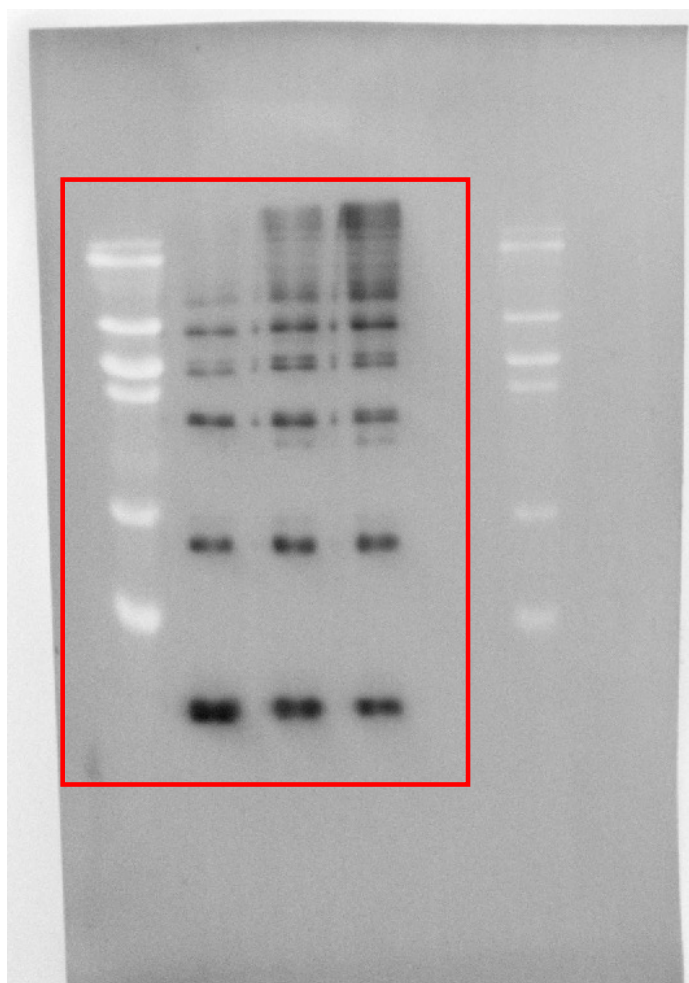

The marked area is presented in figure 3B

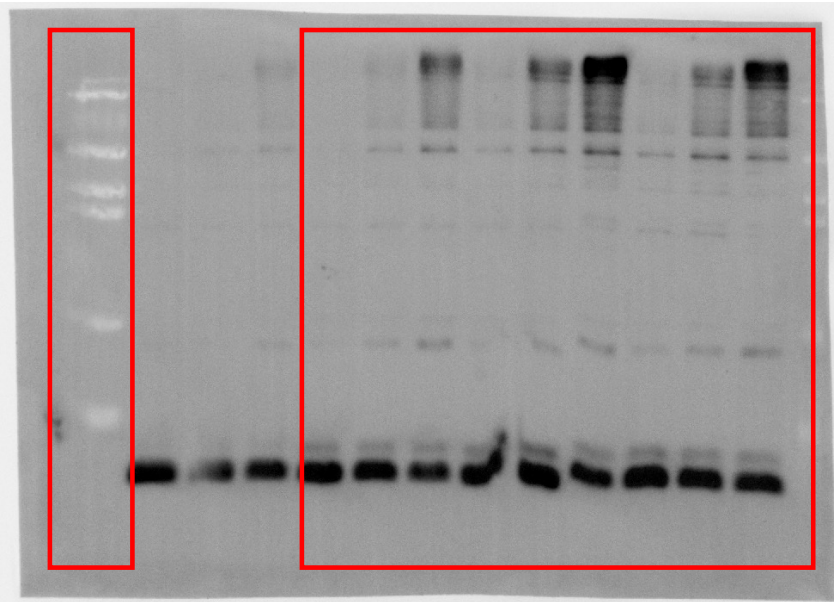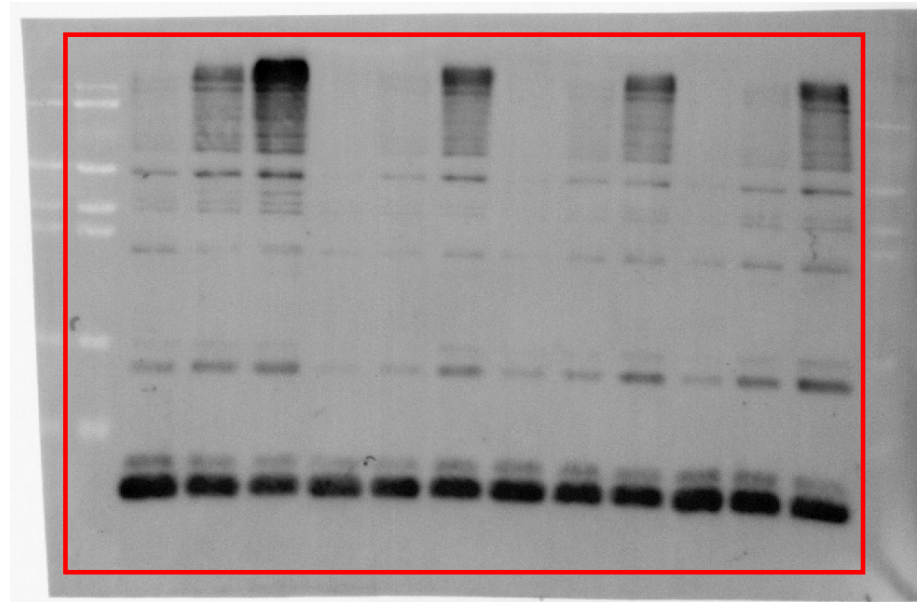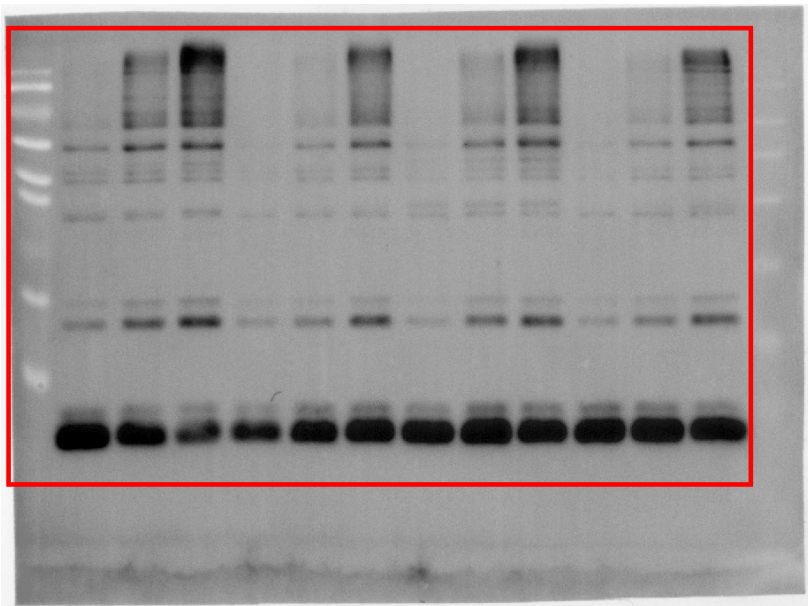

Repeat 1 for experiments presented in figure 3C. Marked areas are presented in figure 3C.

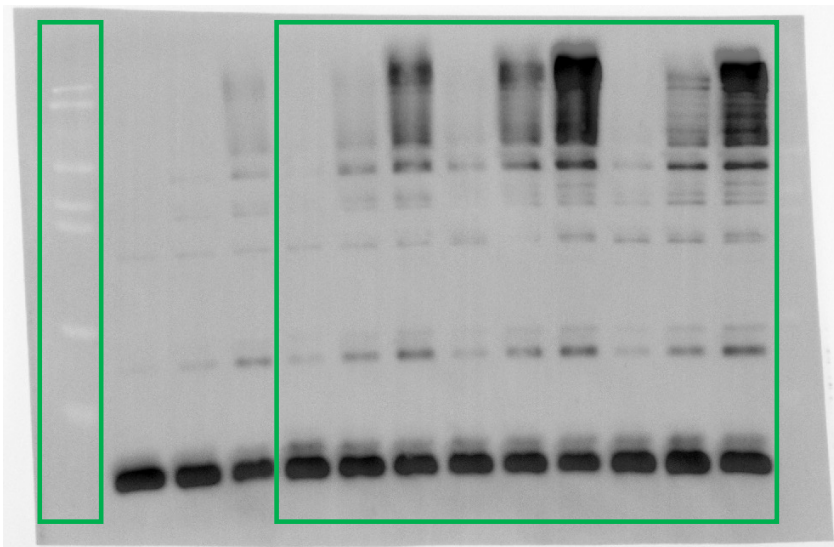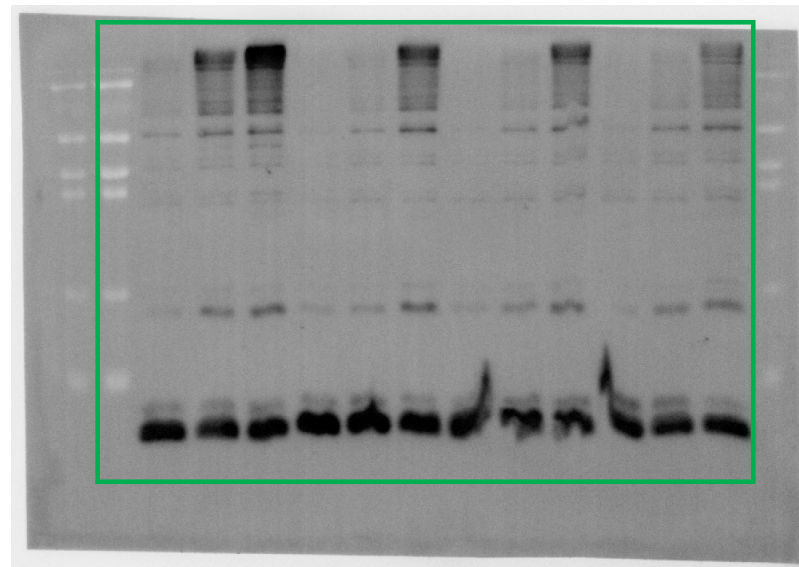

Repeat 2 for experiments presented in figure 3C.  
Marked areas are equivalent to areas presented in  
figure 3C.

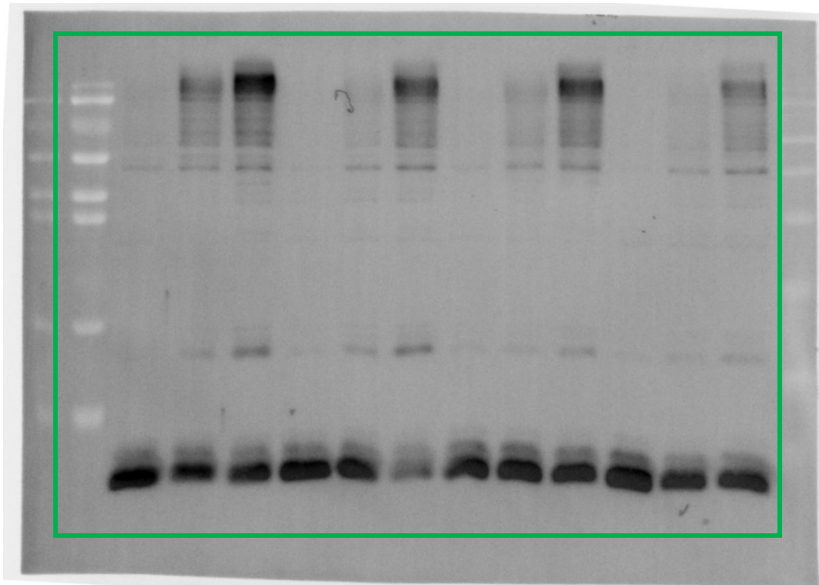

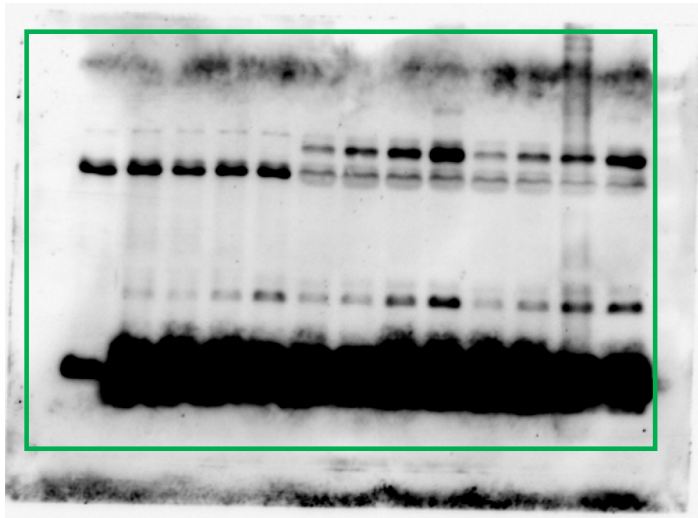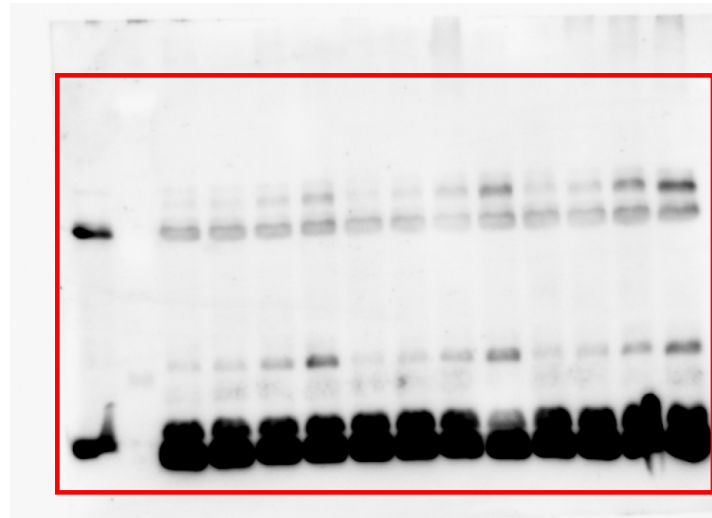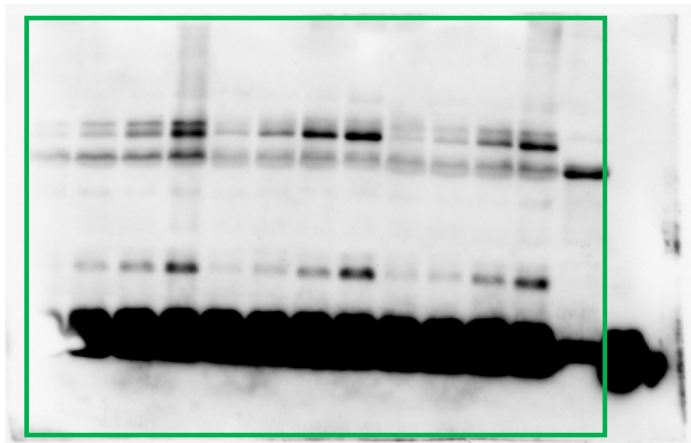

Repeat 1 for experiments presented in figure 3D. Areas marked in red are presented in figure 3D, areas marked in green are equivalent to areas presented in figure 3D.

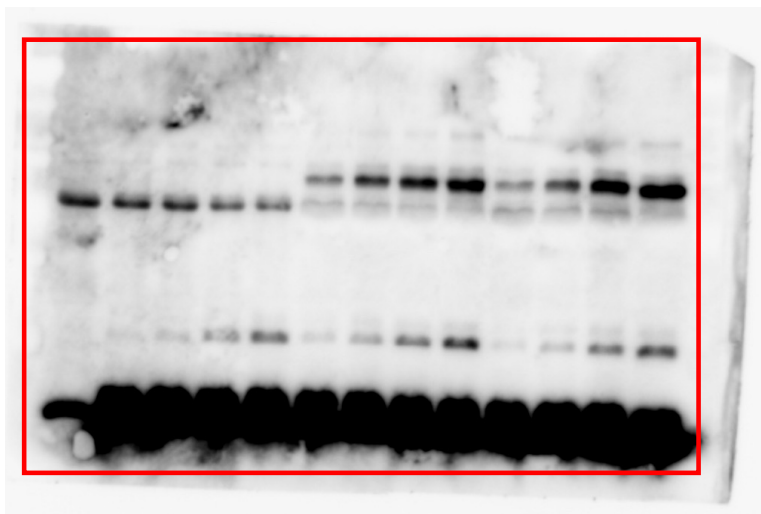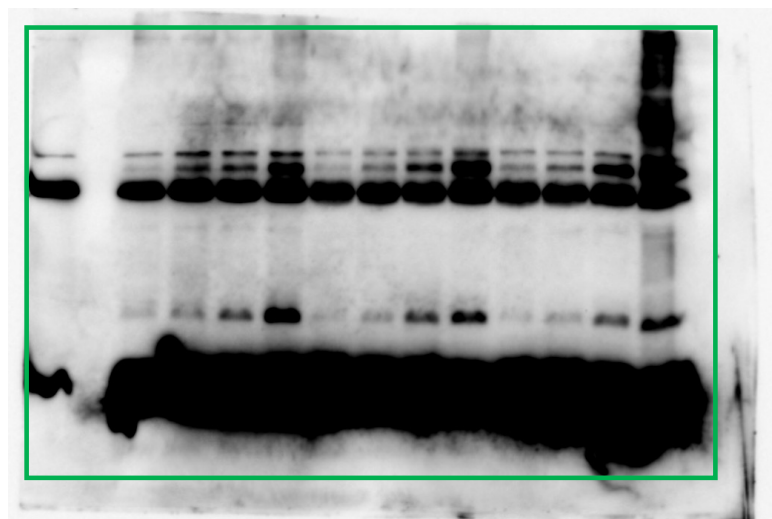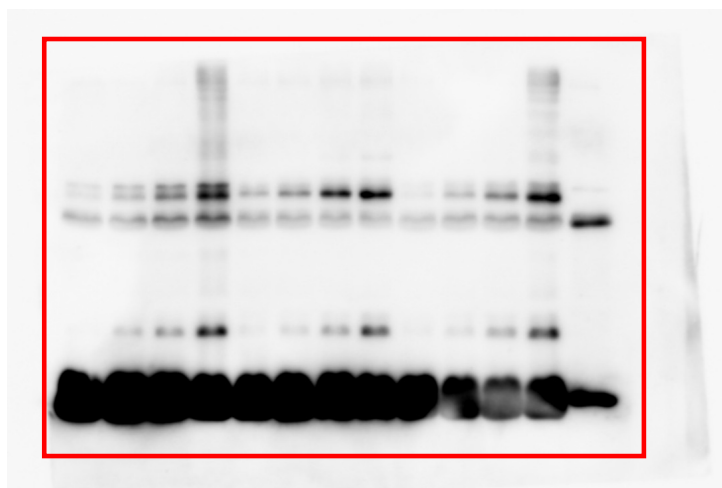

Repeat 2 for experiments presented in figure 3D. Areas marked in red are presented in figure 3D, areas marked in green are equivalent to areas presented in figure 3D.



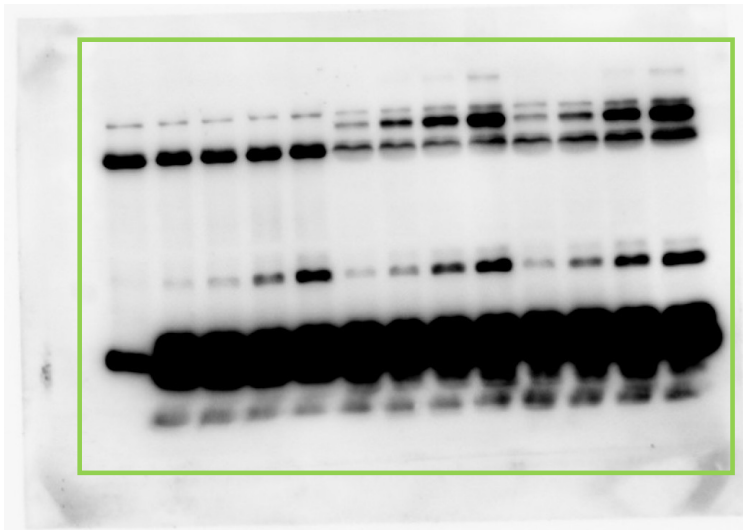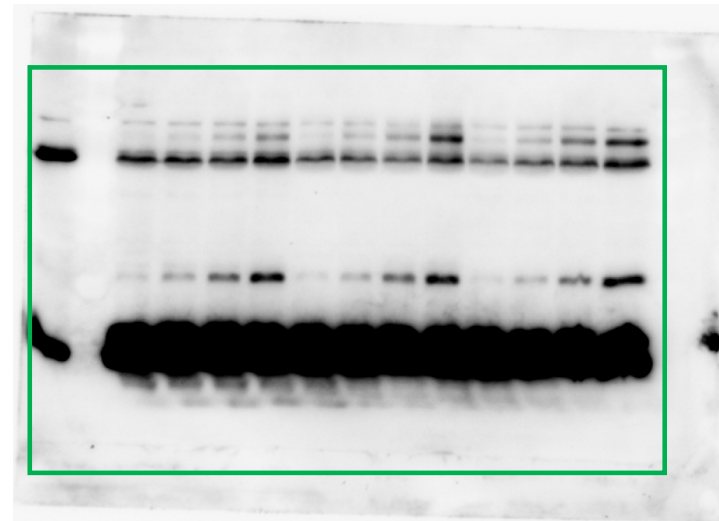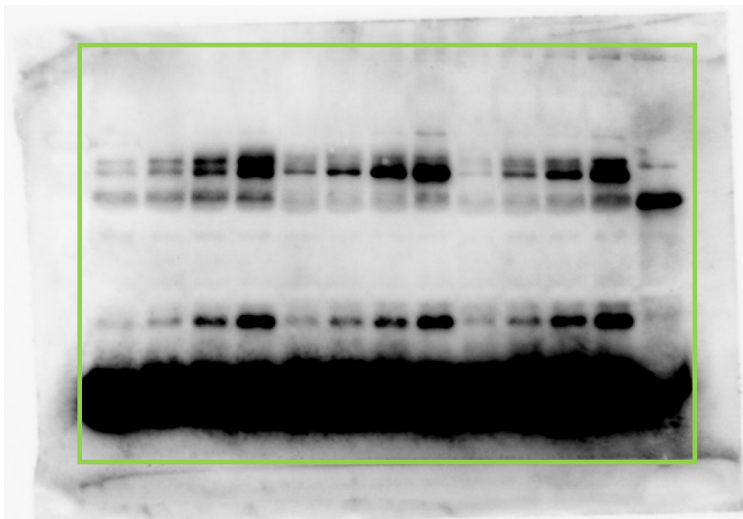

Repeat 3 for experiments presented in figure 3D. Areas marked in green are equivalent to areas presented in figure 3D.
