# Supplementary figures and images for: Structural basis for the Rad6 activation by the Bre1 N-terminal domain
Source: eLife journal article supplement (doi:10.7554/elife.84157), 2023-03-13

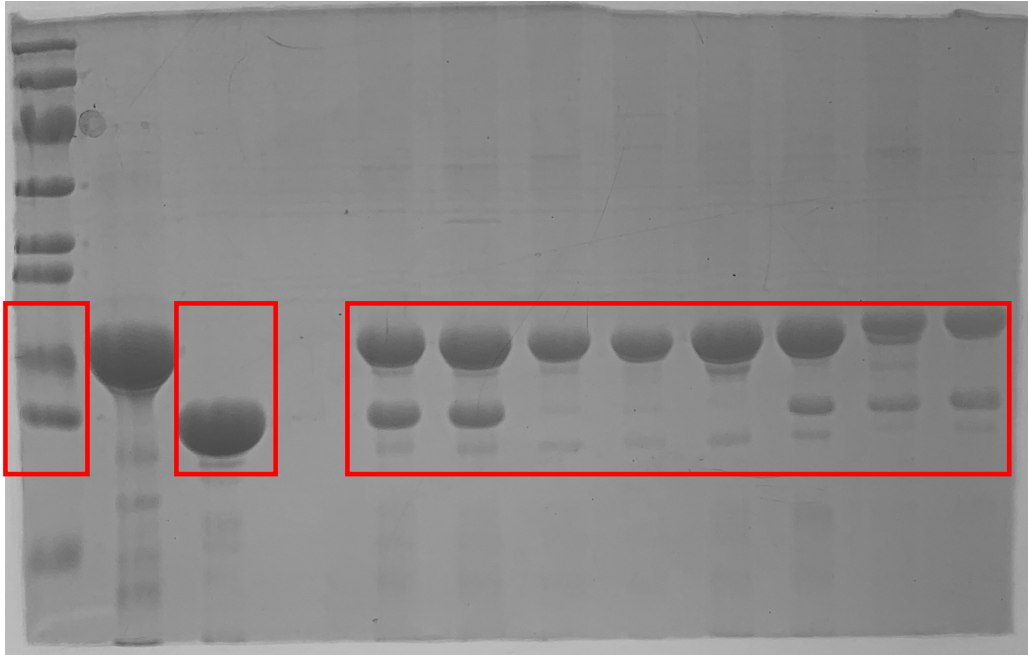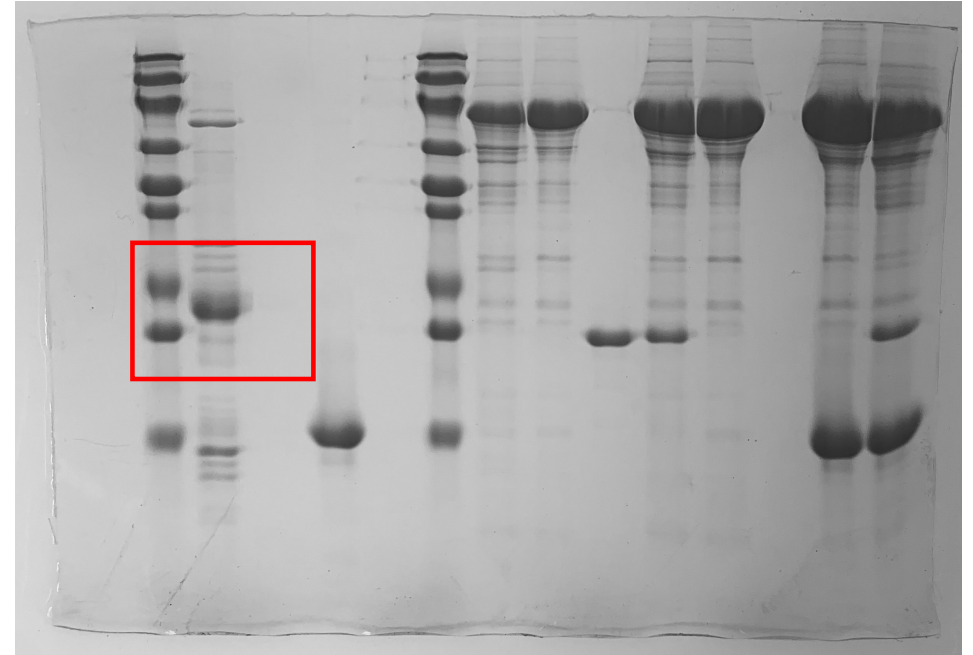

Marked areas are presented in figure 2C

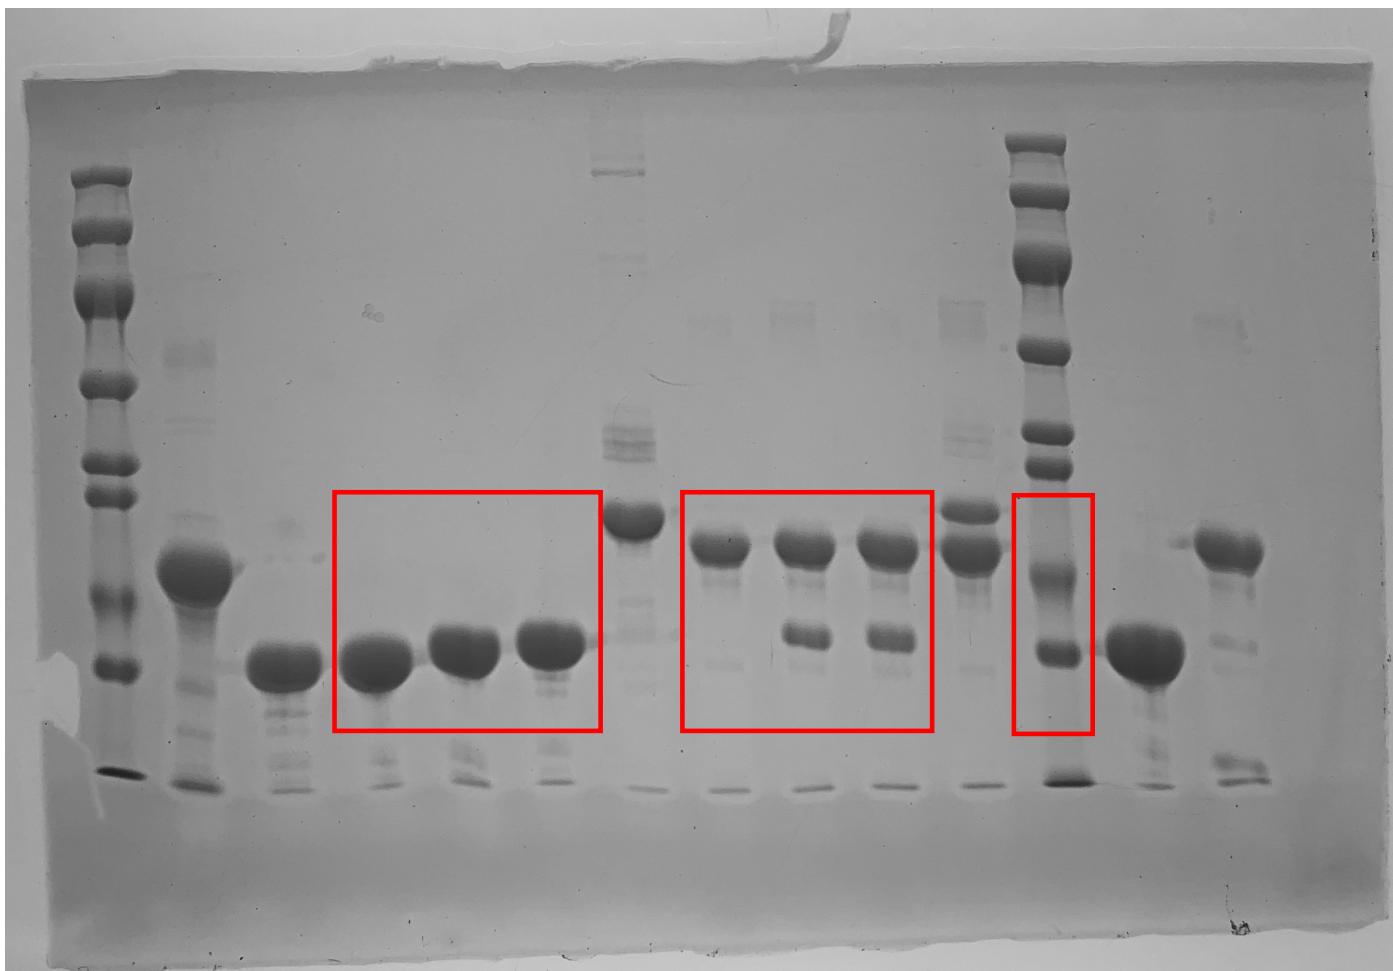

Marked areas are presented in figure 2D

Supplement: supp [file elife-84157-supp-v1.zip]

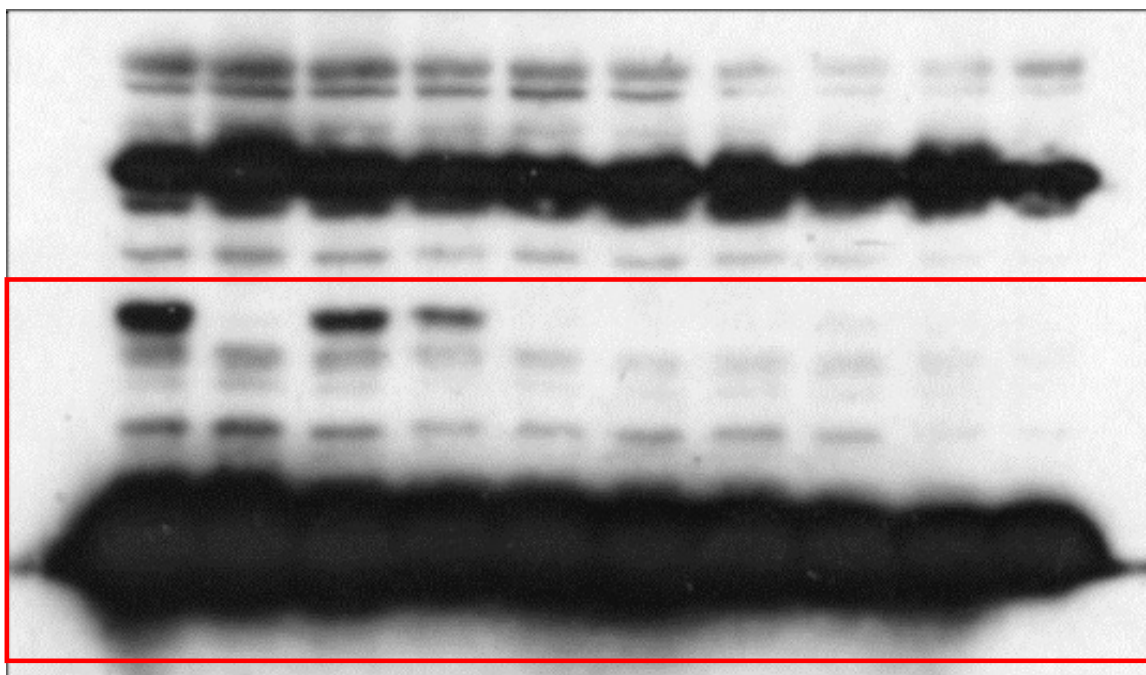

The marked area is presented in figure 5A

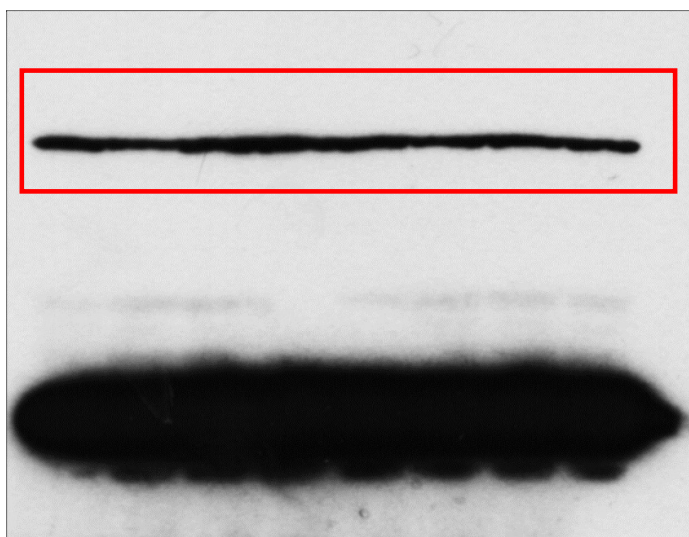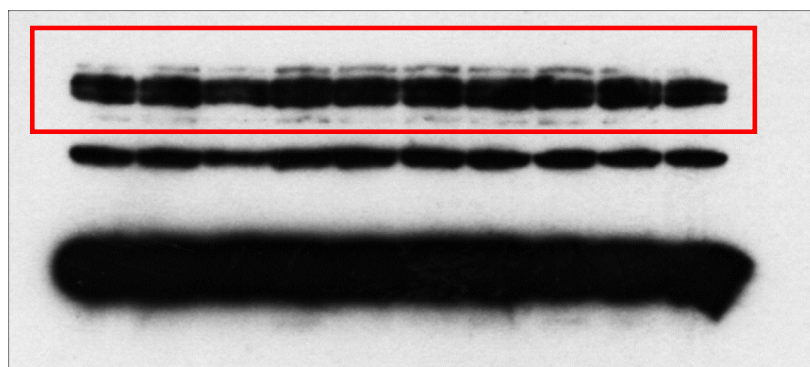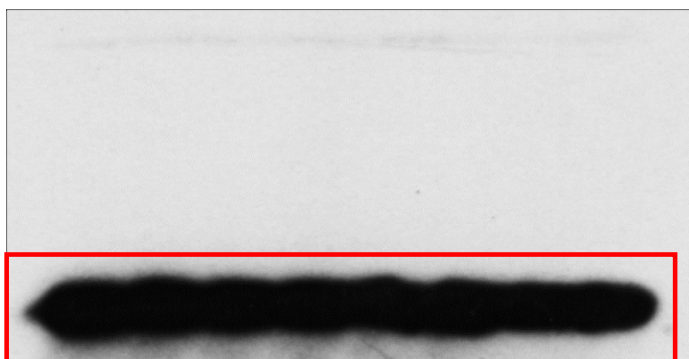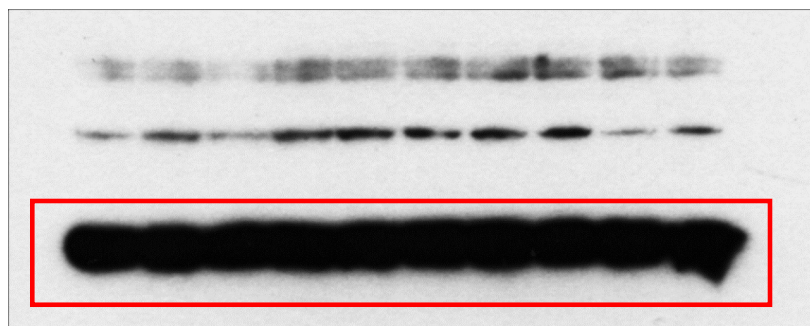

Marked areas are presented in figure 5E

Supplement: supp [file elife-84157-supp-v1.zip]

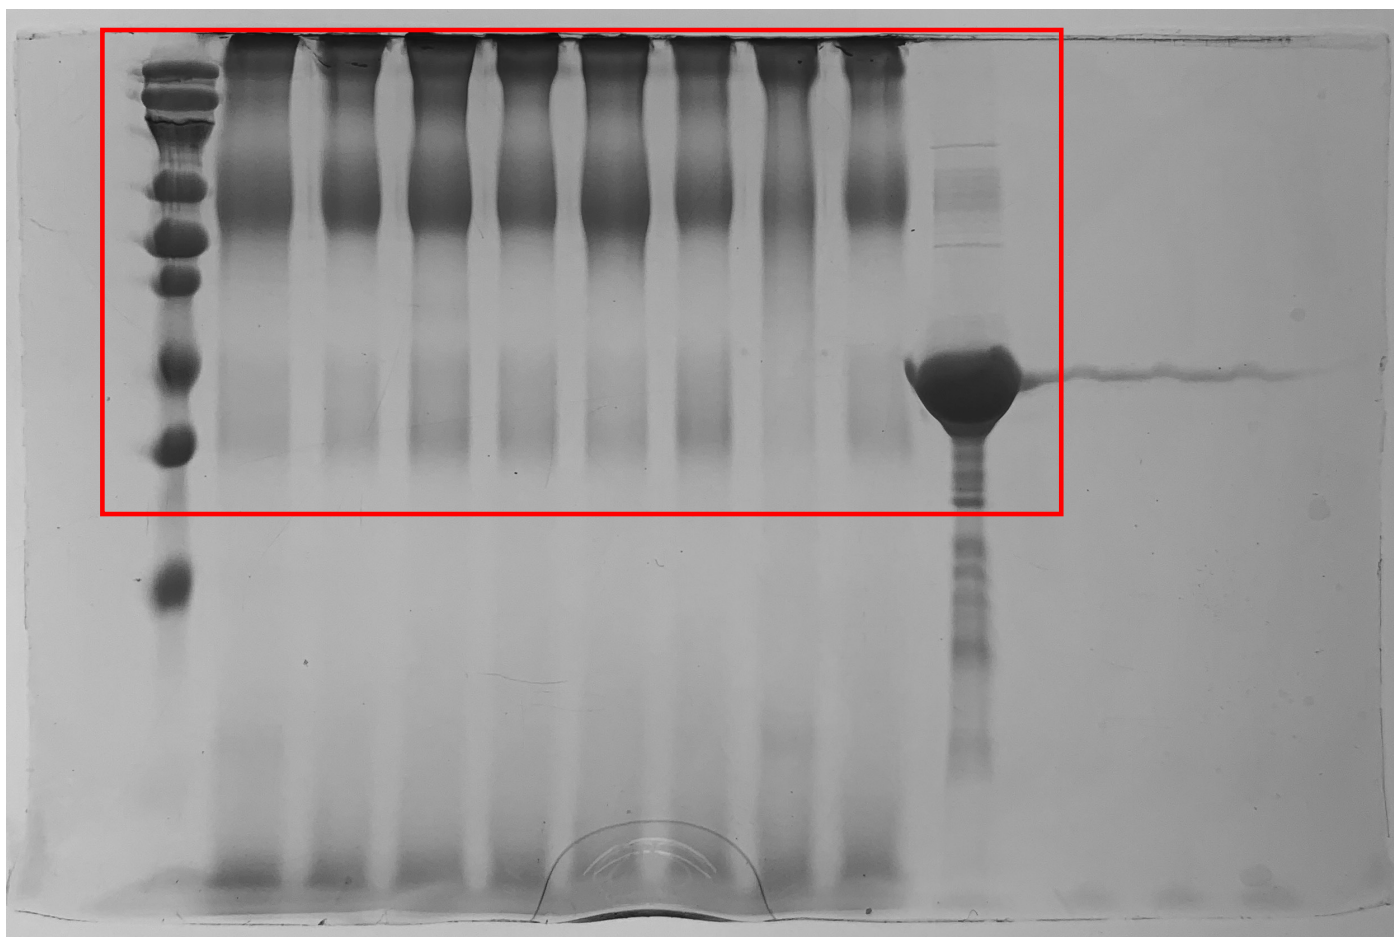

The marked area is presented in panel A

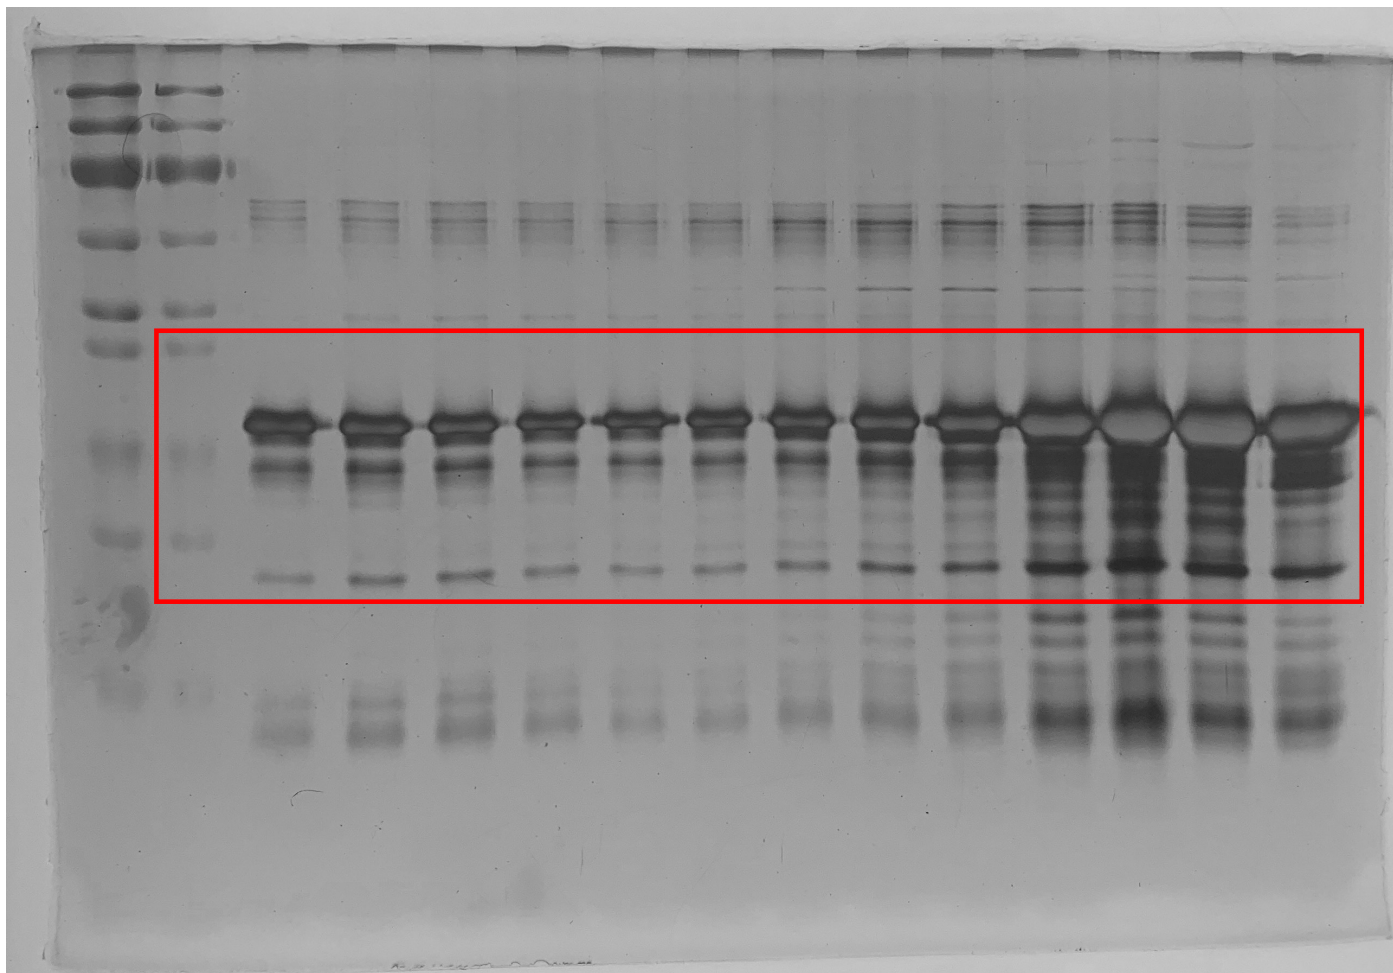

The marked area is presented in Panel B

Supplement: supp [file elife-84157-supp-v1.zip]
